# Supplementary material
Source: PubMed Central journal article supplement (PMC3818141)
Supplement: NIHMS395716-supplement-1.pdf [file NIHMS395716-supplement-1.pdf]

Supplemental Figures 1-5  
Breast Cancer Research and Treatment

**Patient-derived luminal subtype breast cancer xenografts contain common and unique estrogen  
receptor dependent gene expression signatures**

Peter Kabos, Chunling Li, Jessica Finlay-Schultz, J. Chuck Harrell, Enos Kline, Christina Finlayson,  
Joshua Wisell, Christopher A. Manuel, Susan M. Edgerton, Anthony Elias, and Carol A. Sartorius

**Corresponding author:** Carol Sartorius, University of Colorado Denver Anschutz Medical Center,  
12801 E 17<sup>th</sup> Ave MS8104, Aurora, CO 80045. Phone: 303-724-3937; Fax: 303-724-3712; E-mail:  
[Carol.Sartorius@ucdenver.edu](mailto:Carol.Sartorius@ucdenver.edu)

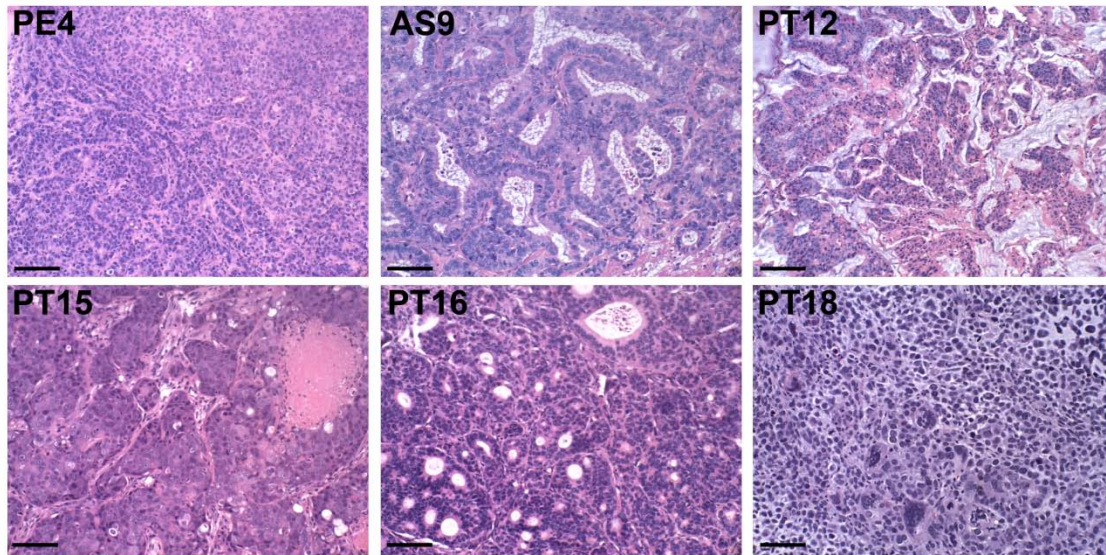

**Supplemental Figure 1.** Hematoxylin and eosin stain of xenograft tumors. Sections of six breast tumor xenografts at passages 1-2 were stained by H&E and photographed at 20x magnification. Scale bars, 100  $\mu$ M.

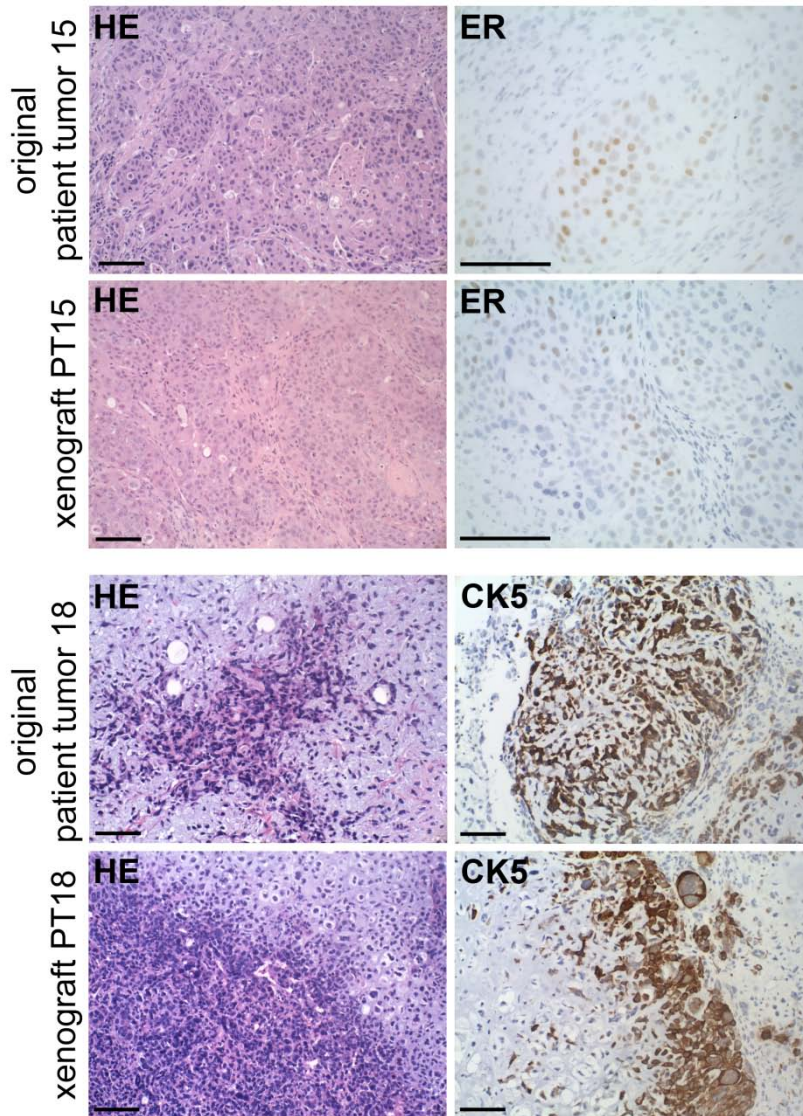

**Supplemental Figure 2.** Patient-derived xenograft tumors morphologically resemble the tumor of origin. For select cases where sufficient material was available (PT15 and PT18), a portion of the original patient tumor was processed into paraffin blocks. Sections (5  $\mu$ M) were cut, and stained by H&E and IHC (ER for PT15, CK5 for PT18) side by side with the corresponding xenografts (PT15 and PT18) at passages 1. Scale bars, 100  $\mu$ M.

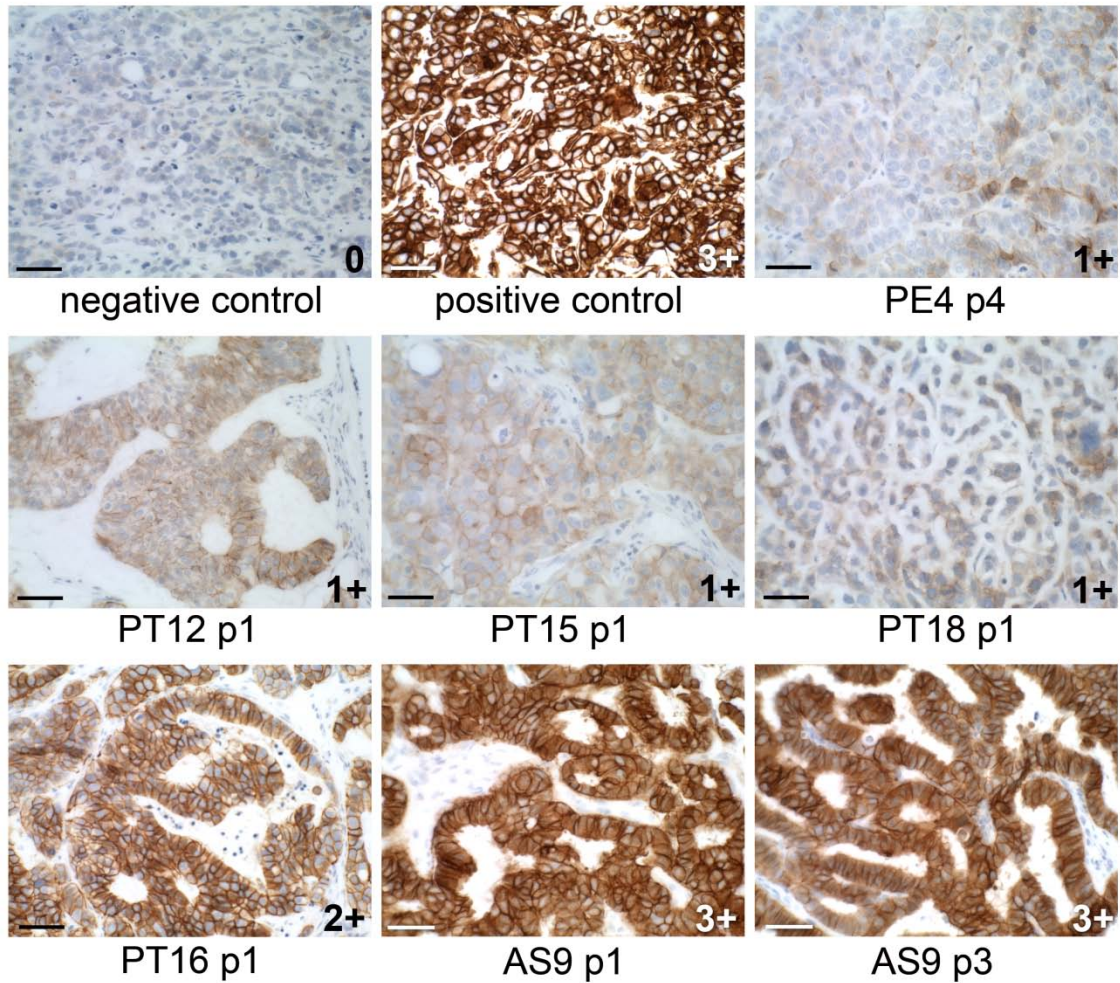

**Supplemental Figure 3.** HER2 expression in xenograft tumors. Sections (5  $\mu$ M) of tumors at passages 1-3 were stained by IHC for HER2. Sections of MCF7 and BT474 xenograft tumors were used as negative and positive controls, respectively. Staining intensities (1-3+) were scored via the Ventana Vias Imaging system, and are indicated on each photograph (1-3+). Scale bars, 100  $\mu$ M.

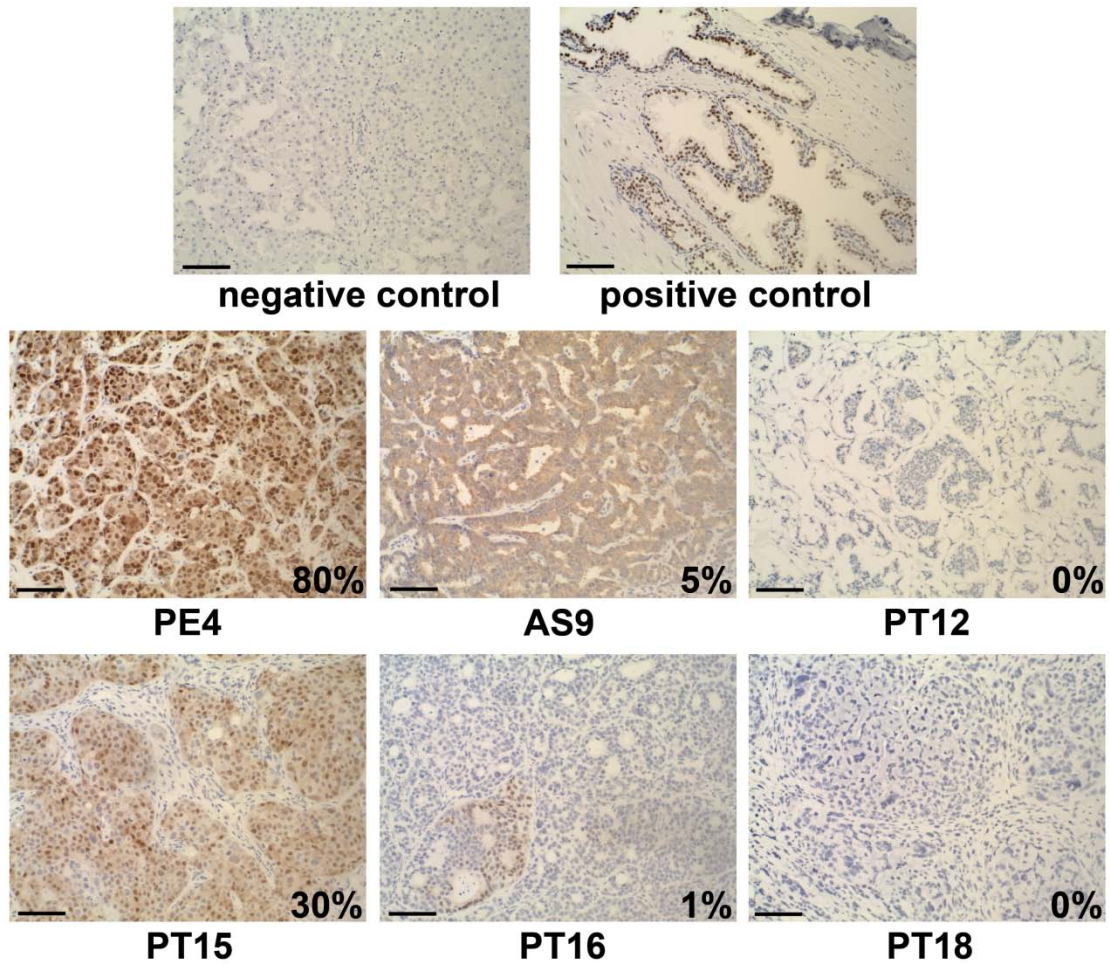

**Supplemental Figure 4.** AR expression in xenograft tumors. Sections (5 μM) of tumors at passages 1-2 were immunostained for AR. Positive and negative controls were normal prostate and tonsil, respectively. Percentages of AR+ cells were scored by a trained pathologist and are indicated on each photograph. For AS9, there was frequent cytoplasmic staining and the percentage reflects nuclear AR. Scale bars, 100 μM.

**A**

| Tumor xenograft | Molecular subtype | Differentiation score |
|-----------------|-------------------|-----------------------|
| PE4             | Luminal B         | 0.11560883            |
| AS9             | Luminal B         | 0.231244405           |
| PT12            | Luminal B         | 0.275798176           |
| PT15            | Her2              | 0.196650968           |
| PT16            | Luminal B         | 0.137181298           |
| PT18            | Basal             | -0.148936882          |

**B**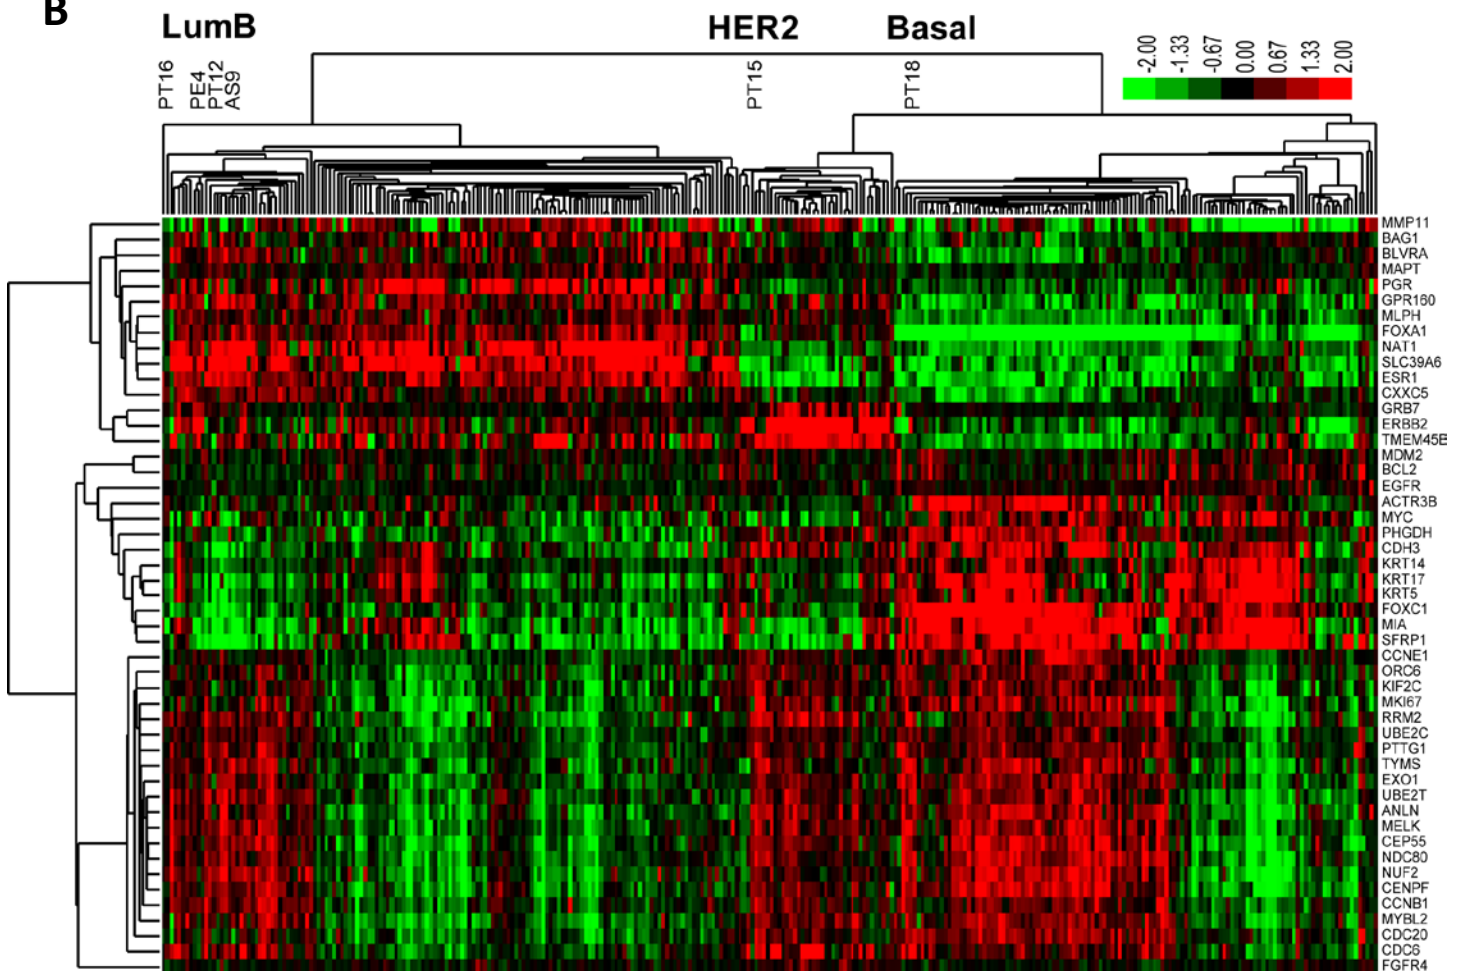

**Supplemental Figure 5.** Molecular subtypes of patient derived breast tumor xenografts. A 50 gene predictor developed by Parker et al (34) was used to align by cluster analysis the six xenograft tumor samples to intrinsic subtypes Luminal A (LumA), Luminal B (LumB), Basal-like, HER2-enriched, and normal-like. **A.** Tabular annotation of Molecular subtype and Differentiation score (a relative measure of ER levels (35)) of each tumor. **B.**
