# Supplementary material
Source: PubMed Central journal article supplement (PMC3818141)
Supplement: NIHMS395716-supplement-2.pdf [file NIHMS395716-supplement-2.pdf]

Supplemental Tables 1-5  
Breast Cancer Research and Treatment

**Patient-derived luminal subtype breast cancer xenografts contain common and unique estrogen  
receptor dependent gene expression signatures**

Peter Kabos, Chunling Li, Jessica Finlay-Schultz, J. Chuck Harrell, Enos Kline, Christina Finlayson,  
Joshua Wisell, Christopher A. Manuel, Susan M. Edgerton, Anthony Elias, and Carol A. Sartorius

**Corresponding author:** Carol Sartorius, University of Colorado Denver Anschutz Medical Center,  
12801 E 17<sup>th</sup> Ave MS8104, Aurora, CO 80045. Phone: 303-724-3937; Fax: 303-724-3712; E-mail:  
[Carol.Sartorius@ucdenver.edu](mailto:Carol.Sartorius@ucdenver.edu)

**Supplementary Table 1.** Ki67 proliferation scores in patient tumor xenografts.

| Tumor line           | Hormone | Tumor 1         | Tumor 2 | Tumor 3 | average |
|----------------------|---------|-----------------|---------|---------|---------|
| PE4                  | E       | 31 <sup>a</sup> | 42      |         | 36.5    |
| AS9                  | E       | 40              | 45      |         | 42.5    |
| PT12                 | E       | 42              | 46      | 44      | 44      |
| PT12                 | E+Tam   | 13              | 15      | 23      | 17      |
| PT12                 | EWD     | 12              | 9       |         | 10.5    |
| PT15                 | E       | 53              | 50      | 49      | 50.7    |
| PT15                 | E+Tam   | 46              | 50      | 46      | 47.3    |
| PT16                 | E       | 32              | 41      |         | 36.5    |
| PT18                 | none    | 73              | 63      |         | 68      |
| PT18 patient         | UNK     | 65              |         |         |         |
| control <sup>b</sup> | none    | 49              |         |         |         |

<sup>a</sup>Measured by immunohistochemistry for Ki67 followed by Ventana Image Analysis (Vias) on sections from 2-3 independent tumors.

<sup>b</sup>Human lymphoma cell line HL60.

**Supplementary Table 2.** Genes that were significantly up- or downregulated by estrogens in patient derived breast cancer xenografts PE4 and PT12 (p<0.05, >1.5 fold change).

**Genes upregulated by estrogen in PE4 and PT12**

| Gene Symbol                | Gene Assignment                                            | PE4 (E vs. placebo) |             | PT12 (E vs. placebo) |             | MCF7 <sup>a</sup> (E 24h vs. vehicle) |             | MCF7 <sup>b</sup> (E 48h vs. vehicle) |             |
|----------------------------|------------------------------------------------------------|---------------------|-------------|----------------------|-------------|---------------------------------------|-------------|---------------------------------------|-------------|
|                            |                                                            | p value             | fold change | p value              | fold change | p value                               | fold change | p value                               | fold change |
| AHNAK2                     | AHNAK nucleoprotein 2                                      | 0.0036              | 1.6981      | 0.0099               | 2.0111      |                                       |             |                                       |             |
| ANXA1                      | annexin A1                                                 | 0.0115              | 2.7556      | 0.0000               | 3.0376      |                                       |             |                                       |             |
| ATP11A                     | ATPase, class VI, type 11A                                 | 0.0155              | 1.6429      | 0.0215               | 1.5138      |                                       |             |                                       |             |
| B4GALT1                    | UDP-Gal:betaGlcNAc beta 1,4- galactosyltransferase, poly   | 0.0002              | 2.5895      | 0.0408               | 1.5276      |                                       |             |                                       |             |
| C3orf57                    | chromosome 3 open reading frame 57                         | 0.0452              | 1.7098      | 0.0016               | 2.7336      |                                       |             |                                       |             |
| CADM2                      | cell adhesion molecule 2                                   | 0.0046              | 2.7176      | 0.0313               | 3.3135      |                                       |             |                                       |             |
| CAPN9                      | calpain 9                                                  | 0.0112              | 1.6174      | 0.0014               | 2.7728      |                                       |             |                                       |             |
| CARS2                      | cysteinyl-tRNA synthetase 2, mitochondrial (putative)      | 0.0022              | 1.7148      | 0.0209               | 1.7005      |                                       |             |                                       |             |
| <b>DPY19L1<sup>c</sup></b> | dpy-19-like 1 (C. elegans)                                 | 0.0112              | 1.5408      | 0.0070               | 1.5190      |                                       |             | 0.0275                                | 2.1668      |
| DSP                        | desmoplakin                                                | 0.0012              | 2.0430      | 0.0074               | 1.5381      |                                       |             |                                       |             |
| FARP1                      | FERM, RhoGEF (ARHGEF) and pleckstrin domain protein 1 (cho | 0.0008              | 2.0351      | 0.0136               | 1.5166      |                                       |             |                                       |             |
| FREM2                      | FRAS1 related extracellular matrix protein 2               | 0.0008              | 2.1527      | 0.0393               | 1.9321      |                                       |             |                                       |             |
| FUS                        | fused in sarcoma                                           | 0.0008              | 1.5228      | 0.0091               | 1.9025      |                                       |             |                                       |             |
| GALNT4                     | UDP-N-acetyl-alpha-D-galactosamine:polypeptide N-acetylga  | 0.0012              | 1.8105      | 0.0002               | 2.0196      |                                       |             |                                       |             |
| <b>GREB1</b>               | growth regulation by estrogen in breast cancer 1           | 0.0383              | 1.9012      | 0.0104               | 6.9974      | 0.0002                                | 7.5601      | 0.0008                                | 7.5372      |
| GRIK3                      | glutamate receptor, ionotropic, kainate 3                  | 0.0012              | 4.4863      | 0.0185               | 1.7028      |                                       |             |                                       |             |
| H2AFY                      | H2A histone family, member Y                               | 0.0009              | 1.6436      | 0.0059               | 1.5404      |                                       |             |                                       |             |
| HEY2                       | hairly/enhancer-of-split related with YRPW motif 2         | 0.0011              | 1.9823      | 0.0005               | 1.9249      |                                       |             |                                       |             |
| KLF6                       | Kruppel-like factor 6                                      | 0.0002              | 1.5083      | 0.0099               | 2.2360      |                                       |             |                                       |             |
| <b>LRIG1</b>               | leucine-rich repeats and immunoglobulin-like domains 1     | 0.0025              | 1.9396      | 0.0170               | 1.7119      | 0.0254                                | 1.8330      | 0.0008                                | 3.4208      |
| LRRFIP1                    | leucine rich repeat (in FLII) interacting protein 1        | 0.0139              | 1.5696      | 0.0217               | 1.6068      |                                       |             |                                       |             |
| MAML3                      | mastermind-like 3 (Drosophila)                             | 0.0019              | 3.3137      | 0.0010               | 1.5862      |                                       |             |                                       |             |
| MID1                       | midline 1 (Opitz/BBB syndrome)                             | 0.0046              | 2.0120      | 0.0371               | 1.7909      |                                       |             |                                       |             |
| MRPS25                     | mitochondrial ribosomal protein S25                        | 0.0025              | 1.5556      | 0.0002               | 2.3402      |                                       |             |                                       |             |
| <b>NOS1AP</b>              | nitric oxide synthase 1 (neuronal) adaptor protein         | 0.0208              | 1.5544      | 0.0028               | 1.9081      | 0.0011                                | 1.5193      |                                       |             |
| PDIA5                      | protein disulfide isomerase family A, member 5             | 0.0022              | 1.7036      | 0.0010               | 2.1393      |                                       |             |                                       |             |
| PREX1                      | phosphatidylinositol-3,4,5-trisphosphate-dependent Rac exc | 0.0103              | 2.8094      | 0.0440               | 1.6803      |                                       |             |                                       |             |
| RUNX1                      | runt-related transcription factor 1                        | 0.0064              | 1.7601      | 0.0157               | 1.8049      |                                       |             |                                       |             |
| S100A14                    | S100 calcium binding protein A14                           | 0.0035              | 1.7290      | 0.0183               | 1.6818      |                                       |             |                                       |             |
| SLC6A6                     | solute carrier family 6 (neurotransmitter transporter, ta  | 0.0057              | 1.7562      | 0.0020               | 2.9840      |                                       |             |                                       |             |
| SLC6A8                     | solute carrier family 6 (neurotransmitter transporter, cr  | 0.0274              | 1.5903      | 0.0251               | 1.6146      |                                       |             |                                       |             |
| SNHG12                     | small nucleolar RNA host gene 12 (non-protein coding)      | 0.0029              | 1.6856      | 0.0005               | 1.8781      |                                       |             |                                       |             |
| SYTL5                      | synaptotagmin-like 5                                       | 0.0147              | 1.7372      | 0.0002               | 3.4537      |                                       |             |                                       |             |
| TPPP3                      | tubulin polymerization-promoting protein family member 3   | 0.0002              | 1.8348      | 0.0318               | 1.5235      |                                       |             |                                       |             |
| TRIM52                     | tripartite motif-containing 52                             | 0.0445              | 1.5747      | 0.0011               | 1.6075      |                                       |             |                                       |             |
| TTC39A                     | tetratricopeptide repeat domain 39A                        | 0.0084              | 1.5419      | 0.0220               | 1.5003      |                                       |             |                                       |             |

**Genes downregulated by estrogen in PE4 and PT12**

| Gene Symbol  | Gene Assignment                                         | PE4 (E vs. placebo) |             | PT12 (E vs. placebo) |             | MCF7 <sup>a</sup> (E 24h vs. vehicle) |             | MCF7 <sup>b</sup> (E 48h vs. vehicle) |             |
|--------------|---------------------------------------------------------|---------------------|-------------|----------------------|-------------|---------------------------------------|-------------|---------------------------------------|-------------|
|              |                                                         | p value             | fold change | p value              | fold change | p value                               | fold change | p value                               | fold change |
| <b>ABCC5</b> | ATP-binding cassette, sub-family C (CFTR/MRP), member 5 | 0.0226              | -1.7600     | 0.0045               | -1.9298     | 0.0003                                | -2.2527     | 0.0000                                | -4.0993     |
| ACADSB       | acyl-CoA dehydrogenase, short/branched chain            | 0.0309              | -2.4217     | 0.0443               | -1.7963     |                                       |             |                                       |             |

|                |                                                             |        |         |        |         |        |         |        |         |
|----------------|-------------------------------------------------------------|--------|---------|--------|---------|--------|---------|--------|---------|
| <b>APOD</b>    | apolipoprotein D                                            | 0.0038 | -2.5756 | 0.0485 | -3.3223 |        |         | 0.0038 | -5.0089 |
| C5orf42        | chromosome 5 open reading frame 42                          | 0.0197 | -1.9759 | 0.0200 | -1.6030 |        |         |        |         |
| CCDC126        | coiled-coil domain containing 126                           | 0.0221 | -2.0062 | 0.0025 | -1.5580 |        |         |        |         |
| CD302          | CD302 molecule                                              | 0.0066 | -2.2678 | 0.0007 | -2.0318 |        |         |        |         |
| <b>CLU</b>     | clusterin                                                   | 0.0084 | -2.0058 | 0.0442 | -1.5035 | 0.0024 | -2.3246 | 0.0000 | -3.6198 |
| COLEC12        | collectin sub-family member 12                              | 0.0240 | -1.5462 | 0.0031 | -2.2792 |        |         |        |         |
| COX17          | COX17 cytochrome c oxidase assembly homolog (S. cerevisiae) | 0.0031 | -1.7100 | 0.0017 | -1.5104 |        |         |        |         |
| FAM102B        | family with sequence similarity 102, member B               | 0.0161 | -1.7885 | 0.0001 | -2.0020 |        |         |        |         |
| FAM173B        | family with sequence similarity 173, member B               | 0.0359 | -1.6472 | 0.0441 | -1.6206 |        |         |        |         |
| <b>FMO5</b>    | flavin containing monooxygenase 5                           | 0.0253 | -2.5699 | 0.0177 | -1.6480 | 0.0005 | -3.3621 |        |         |
| <b>GSTM3</b>   | glutathione S-transferase mu 3 (brain)                      | 0.0141 | -2.8027 | 0.0176 | -1.5966 | 0.0001 | -1.7486 |        |         |
| HIST1H2BM      | histone cluster 1, H2bm                                     | 0.0015 | -3.3957 | 0.0039 | -3.3186 |        |         |        |         |
| <b>LRP2</b>    | low density lipoprotein receptor-related protein 2          | 0.0133 | -3.1125 | 0.0197 | -1.9299 | 0.0008 | -5.7951 |        |         |
| <b>MGAT4A</b>  | mannosyl (alpha-1,3-)-glycoprotein beta-1,4-N-acetylgluco   | 0.0137 | -1.6825 | 0.0000 | -4.3529 |        |         | 0.0013 | -2.6921 |
| MPDZ           | multiple PDZ domain protein                                 | 0.0423 | -1.8453 | 0.0057 | -1.6347 |        |         |        |         |
| <b>PPP1R3C</b> | protein phosphatase 1, regulatory (inhibitor) subunit 3C    | 0.0043 | -2.6744 | 0.0317 | -1.9293 | 0.0059 | -3.6949 | 0.0001 | -2.7632 |
| PPP4R4         | protein phosphatase 4, regulatory subunit 4                 | 0.0000 | -3.9929 | 0.0070 | -1.7419 |        |         |        |         |
| <b>PRKACB</b>  | protein kinase, cAMP-dependent, catalytic, beta             | 0.0242 | -1.7232 | 0.0075 | -1.8311 |        |         | 0.0421 | -1.8797 |
| <b>RAB30</b>   | RAB30, member RAS oncogene family                           | 0.0039 | -2.9383 | 0.0100 | -1.7119 | 0.0067 | -1.7377 |        |         |
| RARRES3        | retinoic acid receptor responder (tazarotene induced) 3     | 0.0213 | -1.9008 | 0.0013 | -2.2876 |        |         |        |         |
| REEP1          | receptor accessory protein 1                                | 0.0079 | -2.0093 | 0.0000 | -1.9088 |        |         |        |         |
| SCUBE2         | signal peptide, CUB domain, EGF-like 2                      | 0.0178 | -1.6358 | 0.0011 | -5.8264 |        |         |        |         |
| <b>SEPP1</b>   | selenoprotein P, plasma, 1                                  | 0.0436 | -1.5565 | 0.0143 | -1.7700 | 0.0334 | -1.7901 |        |         |
| SEPT10         | septin 10                                                   | 0.0033 | -1.5992 | 0.0450 | -1.6019 |        |         |        |         |
| SERPINI1       | serpin peptidase inhibitor, clade I (neuroserpin), m        | 0.0313 | -2.8786 | 0.0046 | -2.9349 |        |         |        |         |
| SLC30A8        | solute carrier family 30 (zinc transporter), member 8       | 0.0004 | -3.2431 | 0.0266 | -2.0221 |        |         |        |         |
| <b>SQRDL</b>   | sulfide quinone reductase-like (yeast)                      | 0.0035 | -1.6301 | 0.0022 | -1.5919 |        |         | 0.0321 | -1.9094 |
| TMEM60         | transmembrane protein 60                                    | 0.0038 | -1.8607 | 0.0008 | -1.5029 |        |         |        |         |
| TNIK           | TRAF2 and NCK interacting kinase                            | 0.0013 | -1.6765 | 0.0040 | -2.5863 |        |         |        |         |
| TPRG1          | tumor protein p63 regulated 1                               | 0.0123 | -2.0119 | 0.0014 | -7.9217 |        |         |        |         |
| TTLL7          | tubulin tyrosine ligase-like family, member 7               | 0.0236 | -2.0150 | 0.0290 | -1.5141 |        |         |        |         |
| ZBTB38         | zinc finger and BTB domain containing 38                    | 0.0272 | -1.6793 | 0.0167 | -1.6927 |        |         |        |         |
| ZMAT1          | zinc finger, matrin-type 1                                  | 0.0410 | -2.0566 | 0.0412 | -1.5995 |        |         |        |         |

<sup>a</sup>determined by importing dataset GSE3834 into Partek Genomics Suite and cross analyzing the E regulated genes at 24h vs. vehicle with that for PE4 and PT1

<sup>b</sup>determined by importing dataset GSE848 into Partek Genomics Suite and cross analyzing the E regulated genes at 48h vs vehicle with that for PE4 and PT12

<sup>c</sup>genes also regulated in MCF7 cells are indicated in bold

**Supplemental Table 3.** Genes that were significantly up- or downregulated by estrogen in xenograft PE4 and MCF7 cells

**Genes upregulated by estrogen in PE4 and MCF7 cells**

| Gene Symbol         | Gene Assignment                                             | PE4 (E vs. placebo) |             | MCF7 <sup>a</sup> (E 24h vs. vehicle) |             | MCF7 <sup>b</sup> (E 48h vs. vehicle) |             |
|---------------------|-------------------------------------------------------------|---------------------|-------------|---------------------------------------|-------------|---------------------------------------|-------------|
|                     |                                                             | p value             | fold change | p value                               | fold change | p value                               | fold change |
| CXCL12              | chemokine (C-X-C motif) ligand 12                           | 0.0058              | 2.8930      | 0.0000                                | 7.4458      | 0.0031                                | 4.1194      |
| IGFBP5 <sup>c</sup> | insulin-like growth factor binding protein 5                | 0.0193              | 1.6604      | 0.0024                                | 3.9857      | 0.0067                                | -1.9389     |
| MYBL1               | v-myb myeloblastosis viral oncogene homolog (avian)-lik     | 0.0215              | 1.5058      | 0.0096                                | 4.9684      | 0.0119                                | 4.2726      |
| CCDC88C             | coiled-coil domain containing 88C                           | 0.0005              | 4.3296      | 0.0415                                | 1.7125      |                                       |             |
| CHI3L1              | chitinase 3-like 1 (cartilage glycoprotein-39)              | 0.0004              | 3.5260      | 0.0221                                | 2.0589      |                                       |             |
| ZNF238              | zinc finger protein 238                                     | 0.0000              | 3.3468      | 0.0175                                | 1.9864      |                                       |             |
| PITX1               | paired-like homeodomain 1                                   | 0.0018              | 3.1263      | 0.0257                                | 1.7593      |                                       |             |
| PCDH7               | protocadherin 7                                             | 0.0276              | 2.1694      | 0.0028                                | 1.9326      |                                       |             |
| BFSP2               | beaded filament structural protein 2, phakinin              | 0.0010              | 1.9107      | 0.0037                                | 3.5135      |                                       |             |
| IRS1                | insulin receptor substrate 1                                | 0.0315              | 1.8289      | 0.0362                                | 1.7249      |                                       |             |
| PLCB2               | phospholipase C, beta 2                                     | 0.0034              | 1.8287      | 0.0262                                | 2.3371      |                                       |             |
| IGFBP4              | insulin-like growth factor binding protein 4                | 0.0463              | 1.8268      | 0.0000                                | 4.3662      |                                       |             |
| USP10               | ubiquitin specific peptidase 10                             | 0.0000              | 1.6138      | 0.0252                                | 1.9480      |                                       |             |
| ELF1                | E74-like factor 1 (ets domain transcription factor)         | 0.0110              | 1.5867      | 0.0004                                | 2.1860      |                                       |             |
| CSNK2A2             | casein kinase 2, alpha prime polypeptide                    | 0.0001              | 1.5353      | 0.0018                                | 1.9496      |                                       |             |
| DLEU1               | deleted in lymphocytic leukemia 1 (non-protein coding)      | 0.0016              | 1.5327      | 0.0011                                | 2.0886      |                                       |             |
| RAPGEFL1            | Rap guanine nucleotide exchange factor (GEF)-like 1         | 0.0185              | 2.4652      |                                       |             | 0.0018                                | 2.0482      |
| TSKU                | tsukushi small leucine rich proteoglycan homolog (Xenopus I | 0.0204              | 2.4355      |                                       |             | 0.0008                                | 2.1076      |
| MYC                 | v-myc myelocytomatosis viral oncogene homolog (avian)       | 0.0033              | 1.8314      |                                       |             | 0.0009                                | 2.1909      |
| SCNN1B              | sodium channel, nonvoltage-gated 1, beta                    | 0.0003              | 1.8133      |                                       |             | 0.0075                                | 1.6195      |
| CA8                 | carbonic anhydrase VIII                                     | 0.0349              | 1.6258      |                                       |             | 0.0003                                | 2.4579      |
| TRAP1               | TNF receptor-associated protein 1                           | 0.0004              | 1.5939      |                                       |             | 0.0251                                | 1.5962      |
| GFRA1               | GDNF family receptor alpha 1                                | 0.0020              | 1.5199      |                                       |             | 0.0139                                | 1.9436      |

**Genes downregulated by estrogen in PE4 and MCF7 cells**

| Gene Symbol        | Gene Assignment                                            | PE4 (E vs. placebo) |             | MCF7 <sup>a</sup> (E 24h vs. vehicle) |             | MCF7 <sup>b</sup> (E 48h vs. vehicle) |             |
|--------------------|------------------------------------------------------------|---------------------|-------------|---------------------------------------|-------------|---------------------------------------|-------------|
|                    |                                                            | p value             | fold change | p value                               | fold change | p value                               | fold change |
| DEBS1              | degenerative spermatocyte homolog 1, lipid desaturase (Dro | 0.0000              | -3.9628     | 0.0046                                | -1.7285     | 0.0228                                | -2.5707     |
| EFEMP1             | EGF-containing fibulin-like extracellular matrix protein   | 0.0313              | -1.9897     | 0.0065                                | -2.0404     | 0.0211                                | -2.5249     |
| PLCB1 <sup>c</sup> | phospholipase C, beta 1 (phosphoinositide-specific)        | 0.0108              | -1.9417     | 0.0149                                | 2.3444      | 0.0008                                | -5.1838     |
| REEP5              | receptor accessory protein 5                               | 0.0000              | -1.9168     | 0.0011                                | -1.6452     | 0.0435                                | -2.1849     |
| ABCC3              | ATP-binding cassette, sub-family C (CFTR/MRP)              | 0.0022              | -1.8558     | 0.0339                                | -1.9521     | 0.0155                                | -1.9892     |
| PTPRK              | protein tyrosine phosphatase, receptor type, K             | 0.0069              | -1.7284     | 0.0005                                | -1.9769     | 0.0064                                | -2.3595     |
| ZNF217             | zinc finger protein 217                                    | 0.0006              | -1.7028     | 0.0061                                | -2.1675     | 0.0210                                | -2.7658     |
| TBC1D9             | TBC1 domain family, member 9 (with GRAM domain)            | 0.0299              | -1.6818     | 0.0071                                | -1.9199     | 0.0031                                | -2.0569     |

|                     |                                                                          |        |         |        |         |        |         |
|---------------------|--------------------------------------------------------------------------|--------|---------|--------|---------|--------|---------|
| PLSCR1 <sup>c</sup> | phospholipid scramblase 1                                                | 0.0285 | -1.6447 | 0.0412 | 2.7902  | 0.0345 | -1.7519 |
| ARNT2               | aryl-hydrocarbon receptor nuclear translocator 2                         | 0.0030 | -1.5821 | 0.0024 | -2.4366 | 0.0003 | -4.1029 |
| EXT1                | exostosin 1                                                              | 0.0005 | -1.5609 | 0.0078 | -1.9136 | 0.0180 | -2.2316 |
| NCOA1 <sup>c</sup>  | nuclear receptor coactivator 1                                           | 0.0002 | -1.5329 | 0.0131 | 1.5338  | 0.0051 | -2.1358 |
| ATP2B1              | ATPase, Ca <sup>++</sup> transporting, plasma membrane 1                 | 0.0004 | -1.5315 | 0.0257 | -1.5691 | 0.0321 | -2.6862 |
| AMIGO2              | adhesion molecule with Ig-like domain 2                                  | 0.0022 | -3.5262 | 0.0242 | -1.9959 |        |         |
| ALDHB2              | aldehyde dehydrogenase 3 family, member B2                               | 0.0034 | -3.4937 | 0.0111 | -1.5166 |        |         |
| NELL2               | NEL-like 2 (chicken)                                                     | 0.0198 | -3.1370 | 0.0001 | -4.2687 |        |         |
| DCLK1               | doublecortin-like kinase 1                                               | 0.0127 | -2.9794 | 0.0407 | -4.9398 |        |         |
| UGCG                | UDP-glucose ceramide glucosyltransferase                                 | 0.0000 | -2.8354 | 0.0253 | -4.2542 |        |         |
| CTSH                | cathepsin H                                                              | 0.0000 | -2.3196 | 0.0000 | -2.6606 |        |         |
| KIAA1467            | KIAA1467                                                                 | 0.0006 | -2.0953 | 0.0020 | -1.9651 |        |         |
| KCNMA1              | potassium large conductance calcium-activated channel,                   | 0.0004 | -1.8757 | 0.0188 | -1.7074 |        |         |
| C10orf116           | chromosome 10 open reading frame 116                                     | 0.0095 | -1.8651 | 0.0001 | -3.2749 |        |         |
| FN1                 | fibronectin 1                                                            | 0.0456 | -1.7884 | 0.0393 | -2.0841 |        |         |
| CAMK2B              | calcium/calmodulin-dependent protein kinase II beta                      | 0.0034 | -1.7700 | 0.0284 | -1.5490 |        |         |
| NVL                 | nuclear VCP-like                                                         | 0.0030 | -1.7397 | 0.0344 | -1.5459 |        |         |
| SRGAP3              | SLIT-ROBO Rho GTPase activating protein 3                                | 0.0035 | -1.6691 | 0.0302 | -1.5608 |        |         |
| IER3                | immediate early response 3                                               | 0.0164 | -1.6672 | 0.0004 | -3.1870 |        |         |
| PCSK6               | proprotein convertase subtilisin/kexin type 6                            | 0.0225 | -1.5788 | 0.0134 | -1.7592 |        |         |
| SLC7A8              | solute carrier family 7 (amino acid transporter, L-type),                | 0.0212 | -1.5719 | 0.0233 | -1.5872 |        |         |
| KCNJ3               | potassium inwardly-rectifying channel, subfamily J, member               | 0.0244 | -6.7475 |        |         | 0.0252 | -1.6673 |
| MGLL                | monoglyceride lipase                                                     | 0.0000 | -3.3468 |        |         | 0.0027 | -1.8678 |
| ARHGAP29            | Rho GTPase activating protein 29                                         | 0.0034 | -2.6087 |        |         | 0.0060 | -2.6963 |
| NR4A2               | nuclear receptor subfamily 4, group A, member 2                          | 0.0006 | -2.3128 |        |         | 0.0076 | -1.6484 |
| CGA                 | glycoprotein hormones, alpha polypeptide                                 | 0.0005 | -2.2626 |        |         | 0.0249 | -1.5803 |
| VTCN1               | V-set domain containing T cell activation inhibitor 1                    | 0.0020 | -1.9955 |        |         | 0.0010 | -3.6684 |
| MYO6                | myosin VI                                                                | 0.0010 | -1.8854 |        |         | 0.0170 | -2.4509 |
| FUT8                | fucosyltransferase 8 (alpha (1,6) fucosyltransferase)                    | 0.0064 | -1.8565 |        |         | 0.0211 | -2.1720 |
| CRABP1              | cellular retinoic acid binding protein 1                                 | 0.0084 | -1.8465 |        |         | 0.0198 | -1.7653 |
| MXRA7               | matrix-remodelling associated 7                                          | 0.0391 | -1.7403 |        |         | 0.0121 | -2.0274 |
| KRT15               | keratin 15                                                               | 0.0003 | -1.7343 |        |         | 0.0021 | -2.7804 |
| MFSD1               | major facilitator superfamily domain containing 1                        | 0.0160 | -1.7275 |        |         | 0.0146 | -1.8097 |
| OSR2                | odd-skipped related 2 (Drosophila)                                       | 0.0175 | -1.7233 |        |         | 0.0055 | -1.8714 |
| PPP1R2              | protein phosphatase 1, regulatory (inhibitor) subunit 2                  | 0.0055 | -1.7229 |        |         | 0.0094 | -2.4388 |
| CAV2                | caveolin 2                                                               | 0.0097 | -1.7193 |        |         | 0.0304 | -2.7613 |
| ID2                 | inhibitor of DNA binding 2, dominant negative helix-loop-hel             | 0.0001 | -1.7107 |        |         | 0.0136 | -1.7784 |
| SIDT1               | SID1 transmembrane family, member 1                                      | 0.0001 | -1.6554 |        |         | 0.0031 | -2.0050 |
| TBC1D8              | TBC1 domain family, member 8 (with GRAM domain)                          | 0.0059 | -1.6548 |        |         | 0.0055 | -1.7857 |
| ATP1B1              | ATPase, Na <sup>+</sup> /K <sup>+</sup> transporting, beta 1 polypeptide | 0.0245 | -1.6368 |        |         | 0.0149 | -2.0095 |
| SLC31A2             | solute carrier family 31 (copper transporters), member 2                 | 0.0057 | -1.6339 |        |         | 0.0121 | -1.6899 |

|        |                                          |        |         |        |         |
|--------|------------------------------------------|--------|---------|--------|---------|
| SPAG1  | sperm associated antigen 1               | 0.0004 | -1.6129 | 0.0253 | -3.0819 |
| MEGF9  | multiple EGF-like-domains 9              | 0.0052 | -1.5884 | 0.0046 | -2.4701 |
| CRABP2 | cellular retinoic acid binding protein 2 | 0.0053 | -1.5560 | 0.0039 | -2.2333 |
| RAB27B | RAB27B, member RAS oncogene family       | 0.0395 | -1.5283 | 0.0120 | -1.8197 |
| OAT    | ornithine aminotransferase               | 0.0079 | -1.5159 | 0.0151 | -2.8425 |
| SCYL3  | SCY1-like 3 ( <i>S. cerevisiae</i> )     | 0.0216 | -1.5051 | 0.0466 | -1.6084 |

---

<sup>a</sup>determined by importing dataset GSE3834 into Partek Genomics Suite and cross analyzing the E regulated genes at 24h vs. vehicle with that for PE4

<sup>b</sup>determined by importing dataset GSE848 into Partek Genomics Suite and cross analyzing the E regulated genes at 48h vs vehicle with that for PE4

<sup>c</sup>regulated in opposite directions in the two MCF7 datasets

**Supplemental Table 4.** Genes that were significantly up- or downregulated by estrogen in xenograft PT12 and MCF7 cells**Genes upregulated by estrogen in PT12 and MCF7 cells**

| Gene Symbol       | Gene Assignment                                           | PT12(E vs. placebo) |             | MCF7 <sup>a</sup> (E vs. vehicle) |             | MCF7 <sup>b</sup> (E vs. vehicle) |             |
|-------------------|-----------------------------------------------------------|---------------------|-------------|-----------------------------------|-------------|-----------------------------------|-------------|
|                   |                                                           | p value             | fold change | p value                           | fold change | p value                           | fold change |
| IGF1R             | insulin-like growth factor 1 receptor                     | 0.0076              | 3.4567      | 0.0075                            | 1.7710      | 0.0341                            | 1.6409      |
| NPY1R             | neuropeptide Y receptor Y1                                | 0.0061              | 3.4276      | 0.0483                            | 2.9539      | 0.0022                            | 1.9165      |
| KRT7 <sup>c</sup> | keratin 7                                                 | 0.0129              | 3.1712      | 0.0454                            | 3.0057      | 0.0006                            | -2.7195     |
| AREG              | amphiregulin                                              | 0.0064              | 3.0465      | 0.0008                            | 6.5557      | 0.0048                            | 4.1297      |
| PRSS23            | protease, serine, 23                                      | 0.0019              | 2.2374      | 0.0007                            | 4.5111      | 0.0039                            | 1.9276      |
| SAT1 <sup>c</sup> | spermidine/spermine N1-acetyltransferase 1                | 0.0038              | 2.0651      | 0.0442                            | 2.1351      | 0.0056                            | -3.8998     |
| PLS1 <sup>c</sup> | plastin 1                                                 | 0.0074              | 1.7504      | 0.0206                            | 1.8988      | 0.0329                            | -1.9894     |
| CELSR2            | cadherin, EGF LAG seven-pass G-type receptor 2 (flamingo) | 0.0463              | 1.7188      | 0.0024                            | 1.8936      | 0.0029                            | 2.6628      |
| KYNU <sup>c</sup> | kynureninase (L-kynurenine hydrolase)                     | 0.0446              | 1.6097      | 0.0381                            | 2.9128      | 0.0213                            | -2.0076     |
| CENPA             | centromere protein A                                      | 0.0019              | 1.6060      | 0.0038                            | 3.1816      | 0.0020                            | 3.9563      |
| OIP5              | Opa interacting protein 5                                 | 0.0460              | 1.5767      | 0.0269                            | 2.3099      | 0.0227                            | 2.2574      |
| RAD54L            | RAD54-like ( <i>S. cerevisiae</i> )                       | 0.0096              | 1.5642      | 0.0100                            | 1.6375      | 0.0100                            | 1.5334      |
| KIFC1             | kinesin family member C1                                  | 0.0101              | 1.5256      | 0.0258                            | 1.6815      | 0.0002                            | 1.7886      |
| RAB31             | RAB31, member RAS oncogene family                         | 0.0004              | 7.0704      | 0.0000                            | 4.0560      |                                   |             |
| MPPED2            | metallophosphoesterase domain containing 2                | 0.0004              | 5.8904      | 0.0002                            | 3.0312      |                                   |             |
| FBXO9             | F-box protein 9                                           | 0.0027              | 3.1880      | 0.0457                            | 1.6081      |                                   |             |
| TPBG              | trophoblast glycoprotein                                  | 0.0240              | 3.0670      | 0.0000                            | 2.1494      |                                   |             |
| RASGRP1           | RAS guanyl releasing protein 1 (calcium and DAG-regulate  | 0.0161              | 2.7318      | 0.0351                            | 3.3124      |                                   |             |
| C1orf63           | chromosome 1 open reading frame 63                        | 0.0001              | 2.5259      | 0.0126                            | 1.7612      |                                   |             |
| RHOBTB3           | Rho-related BTB domain containing 3                       | 0.0008              | 2.4089      | 0.0013                            | 3.3539      |                                   |             |
| TMPO              | thymopoietin                                              | 0.0309              | 2.1942      | 0.0178                            | 1.8385      |                                   |             |
| CDK2AP1           | cyclin-dependent kinase 2 associated protein 1            | 0.0191              | 2.1929      | 0.0299                            | 1.5625      |                                   |             |
| SRSF2             | serine/arginine-rich splicing factor 2                    | 0.0143              | 2.1454      | 0.0289                            | 1.7620      |                                   |             |
| WEE1              | WEE1 homolog ( <i>S. pombe</i> )                          | 0.0158              | 2.0619      | 0.0115                            | 2.5225      |                                   |             |
| DDB2              | damage-specific DNA binding protein 2, 48kDa              | 0.0146              | 2.0155      | 0.0001                            | 2.2095      |                                   |             |
| SLC39A8           | solute carrier family 39 (zinc transporter), member 8     | 0.0069              | 2.0146      | 0.0013                            | 2.5558      |                                   |             |
| PLP1              | proteolipid protein 1                                     | 0.0050              | 1.9880      | 0.0487                            | 2.4113      |                                   |             |
| NRXN3             | neurexin 3                                                | 0.0143              | 1.9128      | 0.0236                            | 1.5926      |                                   |             |
| AP1S2             | adaptor-related protein complex 1, sigma 2 subunit        | 0.0071              | 1.8694      | 0.0224                            | 2.2578      |                                   |             |
| PFKP              | phosphofructokinase, platelet                             | 0.0329              | 1.8661      | 0.0017                            | 1.5328      |                                   |             |
| SMG1              | SMG1 homolog, phosphatidylinositol 3-kinase-related k     | 0.0008              | 1.8585      | 0.0068                            | 2.7722      |                                   |             |
| HOXC6             | homeobox C6                                               | 0.0092              | 1.8327      | 0.0000                            | 2.5005      |                                   |             |
| CDK2              | cyclin-dependent kinase 2                                 | 0.0289              | 1.8165      | 0.0402                            | 1.5264      |                                   |             |
| COQ2              | coenzyme Q2 homolog, prenyltransferase (yeast)            | 0.0058              | 1.8137      | 0.0002                            | 2.2270      |                                   |             |
| SSFA2             | sperm specific antigen 2                                  | 0.0004              | 1.7891      | 0.0402                            | 1.7464      |                                   |             |
| SRSF1             | serine/arginine-rich splicing factor 1                    | 0.0002              | 1.7223      | 0.0242                            | 1.5694      |                                   |             |
| BCL6              | B-cell CLL/lymphoma 6                                     | 0.0015              | 1.7168      | 0.0018                            | 1.5238      |                                   |             |
| MTDH              | metadherin                                                | 0.0267              | 1.7103      | 0.0131                            | 1.8038      |                                   |             |
| ZWINT             | ZW10 interactor                                           | 0.0081              | 1.7099      | 0.0132                            | 1.6426      |                                   |             |
| NRIP1             | nuclear receptor interacting protein 1                    | 0.0085              | 1.6740      | 0.0003                            | 4.1552      |                                   |             |
| CTDSPL            | CTD (carboxy-terminal domain, RNA polymerase II, polyp    | 0.0145              | 1.6521      | 0.0016                            | 1.5558      |                                   |             |



|          |                                                             |        |        |        |        |        |        |
|----------|-------------------------------------------------------------|--------|--------|--------|--------|--------|--------|
| MALT1    | mucosa associated lymphoid tissue lymphoma translocation g  | 0.0057 | 1.6410 | 0.0429 | 1.6267 |        |        |
| SLC22A5  | solute carrier family 22 (organic cation/carnitine trans    | 0.0068 | 1.6385 | 0.0000 | 3.1855 |        |        |
| GINS1    | GINS complex subunit 1 (Psf1 homolog)                       | 0.0239 | 1.6207 | 0.0358 | 1.7772 |        |        |
| PRPS2    | phosphoribosyl pyrophosphate synthetase 2                   | 0.0149 | 1.5924 | 0.0213 | 1.5150 |        |        |
| CDR2     | cerebellar degeneration-related protein 2, 62kDa            | 0.0086 | 1.5839 | 0.0339 | 1.9183 |        |        |
| CACNB1   | calcium channel, voltage-dependent, beta 1 subunit          | 0.0348 | 1.5816 | 0.0363 | 1.8256 |        |        |
| PGRMC1   | progesterone receptor membrane component 1                  | 0.0096 | 1.5599 | 0.0169 | 1.7063 |        |        |
| YES1     | v-yes-1 Yamaguchi sarcoma viral oncogene homolog 1          | 0.0161 | 1.5476 | 0.0145 | 1.7512 |        |        |
| WHSC1    | Wolf-Hirschhorn syndrome candidate 1                        | 0.0164 | 1.5407 | 0.0328 | 1.6716 |        |        |
| TIPARP   | TCDD-inducible poly(ADP-ribose) polymerase                  | 0.0044 | 1.5223 | 0.0018 | 2.2917 |        |        |
| RAP2A    | RAP2A, member of RAS oncogene family                        | 0.0153 | 1.5095 | 0.0005 | 3.7529 |        |        |
| DDX23    | DEAD (Asp-Glu-Ala-Asp) box polypeptide 23                   | 0.0207 | 1.5024 | 0.0018 | 1.5038 |        |        |
| SERPINA3 | serpin peptidase inhibitor, clade A (alpha-1 antiprotei     | 0.0181 | 3.8425 |        |        | 0.0003 | 2.7709 |
| SHMT2    | serine hydroxymethyltransferase 2 (mitochondrial)           | 0.0339 | 2.1723 |        |        | 0.0001 | 1.9781 |
| KIF22    | kinesin family member 22                                    | 0.0206 | 2.1553 |        |        | 0.0002 | 1.5438 |
| FLNB     | filamin B, beta                                             | 0.0156 | 2.0853 |        |        | 0.0125 | 1.8514 |
| ABHD2    | abhydrolase domain containing 2                             | 0.0005 | 2.0659 |        |        | 0.0386 | 1.5450 |
| IL17RB   | interleukin 17 receptor B                                   | 0.0139 | 2.0542 |        |        | 0.0409 | 1.6970 |
| SLC1A4   | solute carrier family 1 (glutamate/neutral amino acid tra   | 0.0018 | 1.8706 |        |        | 0.0461 | 1.5196 |
| THOC6    | THO complex 6 homolog (Drosophila)                          | 0.0462 | 1.8653 |        |        | 0.0185 | 1.9817 |
| BCS1L    | BCS1-like (S. cerevisiae)                                   | 0.0039 | 1.7203 |        |        | 0.0141 | 1.5686 |
| BOP1     | block of proliferation 1                                    | 0.0384 | 1.6929 |        |        | 0.0414 | 1.6355 |
| HJURP    | Holliday junction recognition protein                       | 0.0037 | 1.6210 |        |        | 0.0049 | 1.5442 |
| IMP4     | IMP4, U3 small nucleolar ribonucleoprotein, homolog (yeast) | 0.0406 | 1.6186 |        |        | 0.0331 | 1.5445 |
| SLC16A1  | solute carrier family 16, member 1 (monocarboxylic ac       | 0.0288 | 1.5996 |        |        | 0.0348 | 1.6135 |
| TIMELESS | timeless homolog (Drosophila)                               | 0.0194 | 1.5934 |        |        | 0.0071 | 1.7971 |
| RET      | ret proto-oncogene                                          | 0.0415 | 1.5668 |        |        | 0.0110 | 2.3941 |

#### Genes downregulated by estrogen in PT12 and MCF7 cells

| Gene Symbol         | Gene Assignment                                            | PE4 (E vs. placebo) |             | MCF7 <sup>a</sup> (E vs. vehicle) |             | MCF7 <sup>b</sup> (E vs. vehicle) |             |
|---------------------|------------------------------------------------------------|---------------------|-------------|-----------------------------------|-------------|-----------------------------------|-------------|
|                     |                                                            | p value             | fold change | p value                           | fold change | p value                           | fold change |
| IGFBP5 <sup>c</sup> | insulin-like growth factor binding protein 5 // 2q33-q36   | 0.0000              | -6.9118     | 0.0024                            | 3.9857      | 0.0067                            | -1.9389     |
| NMI <sup>c</sup>    | N-myc (and STAT) interactor                                | 0.0057              | -2.5659     | 0.0283                            | 2.1350      | 0.0181                            | -2.1158     |
| MT1G <sup>c</sup>   | metallothionein 1G                                         | 0.0037              | -2.2627     | 0.0081                            | -2.5612     | 0.0145                            | 1.5222      |
| IL1R1               | interleukin 1 receptor, type I                             | 0.0097              | -1.9653     | 0.0000                            | -20.6679    | 0.0041                            | -2.7086     |
| RAB9A               | RAB9A, member RAS oncogene family                          | 0.0062              | -1.7558     | 0.0011                            | -2.2166     | 0.0365                            | -2.0419     |
| TRAF5 <sup>c</sup>  | TNF receptor-associated factor 5 // 1q32 // 7188 /// NM_00 | 0.0395              | -1.6967     | 0.0484                            | 1.5783      | 0.0112                            | -2.5905     |
| S100A10             | S100 calcium binding protein A10                           | 0.0054              | -1.5833     | 0.0025                            | -1.5332     | 0.0008                            | -1.6989     |
| RWDD2A              | RWD domain containing 2A                                   | 0.0461              | -1.5649     | 0.0115                            | -2.0835     | 0.0068                            | -2.4669     |
| HOPX                | HOP homeobox                                               | 0.0019              | -1.5202     | 0.0453                            | -3.9143     | 0.0108                            | -2.9189     |
| PVALB               | parvalbumin                                                | 0.0011              | -14.7145    | 0.0000                            | -7.4743     |                                   |             |
| MT1A                | metallothionein 1A                                         | 0.0011              | -5.4612     | 0.0002                            | -2.3006     |                                   |             |
| INSIG2              | insulin induced gene 2                                     | 0.0274              | -2.7457     | 0.0002                            | -2.9188     |                                   |             |
| STC1                | stanniocalcin 1                                            | 0.0002              | -2.3420     | 0.0078                            | -2.1214     |                                   |             |
| PHEX                | phosphate regulating endopeptidase homolog, X-linked       | 0.0178              | -2.3232     | 0.0377                            | -2.1489     |                                   |             |

|           |                                                              |        |         |        |         |        |         |
|-----------|--------------------------------------------------------------|--------|---------|--------|---------|--------|---------|
| CLUAP1    | clusterin associated protein 1 // 16p13.3 // 23059 /// NM    | 0.0106 | -2.0227 | 0.0318 | -1.5119 |        |         |
| DBI       | diazepam binding inhibitor (GABA receptor modulator, acyl-Co | 0.0058 | -1.9828 | 0.0000 | -1.6608 |        |         |
| UPK1A     | uroplakin 1A                                                 | 0.0018 | -1.9266 | 0.0084 | -2.4339 |        |         |
| YIPF1     | Yip1 domain family, member 1 // 1p33-p32.1 // 54432 /// NR   | 0.0158 | -1.8580 | 0.0039 | -1.6453 |        |         |
| CYP2J2    | cytochrome P450, family 2, subfamily J, polypeptide 2 //     | 0.0305 | -1.7731 | 0.0172 | -1.5195 |        |         |
| PRPS1     | phosphoribosyl pyrophosphate synthetase 1                    | 0.0287 | -1.7371 | 0.0042 | -1.9052 |        |         |
| ACPP      | acid phosphatase, prostate // 3q21-q23 // 55 /// NM_0011341  | 0.0422 | -1.6136 | 0.0424 | -1.5283 |        |         |
| ACO1      | aconitase 1, soluble // 9p22-q32 9p21.1 // 48 /// ENST00000  | 0.0088 | -1.6021 | 0.0003 | -1.6105 |        |         |
| PLA2R1    | phospholipase A2 receptor 1, 180kDa                          | 0.0357 | -1.6000 | 0.0427 | -2.1477 |        |         |
| ATP6V1E1  | ATPase, H+ transporting, lysosomal 31kDa, V1 subunit E1      | 0.0067 | -1.5935 | 0.0025 | -1.5163 |        |         |
| BLNK      | B-cell linker                                                | 0.0364 | -1.5877 | 0.0097 | -2.3103 |        |         |
| HLTF      | helicase-like transcription factor // 3q25.1-q26.1 // 6596   | 0.0284 | -1.5669 | 0.0173 | -1.7328 |        |         |
| AKAP5     | A kinase (PRKA) anchor protein 5                             | 0.0197 | -1.5463 | 0.0026 | -3.1879 |        |         |
| BRE       | brain and reproductive organ-expressed (TNFRSF1A modulator)  | 0.0009 | -1.5180 | 0.0002 | -1.9391 |        |         |
| DYNLRB1   | dynein, light chain, roadblock-type 1                        | 0.0003 | -2.5772 |        |         | 0.0474 | -1.5062 |
| HEBP1     | heme binding protein 1                                       | 0.0014 | -2.4174 |        |         | 0.0341 | -1.8391 |
| SAP18     | Sin3A-associated protein, 18kDa                              | 0.0002 | -2.2056 |        |         | 0.0252 | -1.6333 |
| NBEA      | neurobeachin                                                 | 0.0207 | -2.1695 |        |         | 0.0151 | -3.7677 |
| GCNT1     | glucosaminyl (N-acetyl) transferase 1, core 2                | 0.0033 | -2.1458 |        |         | 0.0268 | -1.5191 |
| NPC2      | Niemann-Pick disease, type C2                                | 0.0062 | -2.0671 |        |         | 0.0301 | -1.6105 |
| SGMS1     | sphingomyelin synthase 1                                     | 0.0278 | -1.9939 |        |         | 0.0359 | -2.1285 |
| KIAA0196  | KIAA0196                                                     | 0.0044 | -1.9848 |        |         | 0.0399 | -1.6328 |
| C3orf14   | chromosome 3 open reading frame 14                           | 0.0326 | -1.9295 |        |         | 0.0442 | -1.7383 |
| S100A11   | S100 calcium binding protein A11                             | 0.0014 | -1.9045 |        |         | 0.0002 | -1.6046 |
| HIST1H2BK | HIST1H2BK // histone cluster 1, H2bk                         | 0.0029 | -1.8142 |        |         | 0.0045 | -1.9491 |
| UBR7      | ubiquitin protein ligase E3 component n-recognin 7 (putativ  | 0.0372 | -1.7779 |        |         | 0.0098 | -1.6325 |
| C6orf97   | chromosome 6 open reading frame 97 // 6q25.1 // 80129 //     | 0.0125 | -1.7209 |        |         | 0.0338 | -2.4571 |
| ARID5B    | AT rich interactive domain 5B (MRF1-like)                    | 0.0263 | -1.7208 |        |         | 0.0081 | -3.3378 |
| MANSC1    | MANSC domain containing 1                                    | 0.0102 | -1.7087 |        |         | 0.0224 | -1.8637 |
| ANK3      | ankyrin 3, node of Ranvier                                   | 0.0455 | -1.6878 |        |         | 0.0058 | -1.8658 |
| LXN       | latexin                                                      | 0.0231 | -1.6788 |        |         | 0.0000 | -3.6474 |
| VAMP8     | vesicle-associated membrane protein 8 (endobrevin)           | 0.0028 | -1.6467 |        |         | 0.0355 | -3.1260 |
| ATP5E     | ATP synthase, H+ transporting, mitochondrial F1 complex      | 0.0023 | -1.5856 |        |         | 0.0146 | -1.5317 |
| UBE2L6    | ubiquitin-conjugating enzyme E2L 6 // 11q12 // 9246 /// N    | 0.0284 | -1.5674 |        |         | 0.0065 | -1.7714 |
| DAZAP2    | DAZ associated protein 2 // 12q12 // 9802 /// NM_00113626    | 0.0393 | -1.5665 |        |         | 0.0320 | -1.8282 |
| MAPKSP1   | MAPK scaffold protein 1                                      | 0.0320 | -1.5626 |        |         | 0.0435 | -2.5338 |
| SH3BGRL   | SH3 domain binding glutamic acid-rich protein like           | 0.0204 | -1.5464 |        |         | 0.0068 | -3.9116 |
| SMARCE1   | SWI/SNF related, matrix associated, actin dependent regu     | 0.0006 | -1.5337 |        |         | 0.0103 | -2.5699 |
| TMBIM6    | transmembrane BAX inhibitor motif containing 6               | 0.0082 | -1.5217 |        |         | 0.0048 | -2.1136 |
| YPEL5     | yippee-like 5 (Drosophila)                                   | 0.0097 | -1.5132 |        |         | 0.0010 | -3.7873 |
| SKP1      | S-phase kinase-associated protein 1                          | 0.0336 | -1.5122 |        |         | 0.0499 | -1.9567 |
| FAM3C     | family with sequence similarity 3, member C // 7q31 // 104   | 0.0436 | -1.5028 |        |         | 0.0347 | -1.8255 |

<sup>a</sup>determined by importing dataset GSE3834 into Partek Genomics Suite and cross analyzing the E regulated genes at 24h vs. vehicle with those for PT12 E vs. placebo

<sup>b</sup>determined by importing dataset GSE848 into Partek Genomics Suite and cross analyzing the E regulated genes at 48h vs. vehicle with those for PT12 E vs. placebo

<sup>c</sup>regulated in opposite directions in the two MCF7 datasets

**Supplementary Table 5.** Estrogen up- and down- regulated genes in breast cancer xenograft PT12 that significantly changed in the opposite direction with both tamoxifen and EWD treatment (p<0.05, >1.5 fold).

**Genes upregulated by estrogen and downregulated with E+Tam and EWD**

| Gene Symbol  | Gene Assignment                                         | E vs. placebo |             | E+Tam vs. E |             | EWD vs. E |             | MCF7 <sup>a</sup> (E+TOT vs. E) |             | MCF7 <sup>b</sup> (EWD vs. E) |             |
|--------------|---------------------------------------------------------|---------------|-------------|-------------|-------------|-----------|-------------|---------------------------------|-------------|-------------------------------|-------------|
|              |                                                         | p value       | fold change | p value     | fold change | p value   | fold change | p value                         | fold change | p value                       | fold change |
| ABAT         | 4-aminobutyrate aminotransferase                        | 0.0172        | 2.0946      | 0.0300      | -1.9299     | 0.0267    | -1.9633     |                                 |             | 0.0484                        | 1.7393      |
| ABCC2        | ATP-binding cassette, sub-family C (CFTR/MRP), member 2 | 0.0000        | 2.8698      | 0.0001      | -2.2119     | 0.0004    | -2.0162     | 0.0149                          | 3.4628      |                               |             |
| BDKRB2       | bradykinin receptor B2                                  | 0.0012        | 2.0633      | 0.0261      | -1.5391     | 0.0009    | -2.1290     |                                 |             |                               |             |
| C10orf116    | chromosome 10 open reading frame 116                    | 0.0005        | 2.1093      | 0.0016      | -1.8990     | 0.0005    | -2.1029     |                                 |             |                               |             |
| CDCA5        | cell division cycle associated 5                        | 0.0094        | 1.6479      | 0.0149      | -1.5811     | 0.0147    | -1.5829     |                                 |             |                               |             |
| CHRNA5       | cholinergic receptor, nicotinic, alpha 5                | 0.0372        | 1.9227      | 0.0351      | -1.9400     | 0.0226    | -2.0774     |                                 |             | 0.0026                        | 2.0006      |
| CRABP1       | cellular retinoic acid binding protein 1                | 0.0016        | 3.3720      | 0.0044      | -2.8405     | 0.0422    | -1.9581     |                                 |             |                               |             |
| EFNA5        | ephrin-A5                                               | 0.0366        | 1.6763      | 0.0418      | -1.6490     | 0.0433    | -1.6421     |                                 |             |                               |             |
| EGLN3        | egl nine homolog 3 (C. elegans)                         | 0.0010        | 7.7939      | 0.0302      | -3.1787     | 0.0232    | -3.4055     |                                 |             |                               |             |
| FAM38B       | family with sequence similarity 38, member B            | 0.0171        | 1.8279      | 0.0034      | -2.2256     | 0.0047    | -2.1366     |                                 |             |                               |             |
| GINS1        | GINS complex subunit 1 (Psf1 homolog)                   | 0.0239        | 1.6207      | 0.0083      | -1.8088     | 0.0158    | -1.6913     |                                 |             |                               |             |
| GREB1        | growth regulation by estrogen in breast cancer 1        | 0.0104        | 6.9974      | 0.0275      | -4.9644     | 0.0430    | -4.2334     | 0.0148                          | 3.2822      | 0.0015                        | 5.7569      |
| HIST1H2AB    | histone cluster 1, H2ab                                 | 0.0316        | 1.5886      | 0.0179      | -1.6870     | 0.0139    | -1.7317     |                                 |             |                               |             |
| HJURP        | Holliday junction recognition protein                   | 0.0037        | 1.6210      | 0.0047      | -1.5935     | 0.0029    | -1.6525     |                                 |             |                               |             |
| IGF1R        | insulin-like growth factor 1 receptor                   | 0.0076        | 3.4567      | 0.0941      | -2.0068     | 0.0212    | -2.7761     | 0.0119                          | 1.6848      | 0.0109                        | 3.4155      |
| LOC100127981 | hypothetical protein LOC100127980                       | 0.0111        | 1.8422      | 0.0204      | -1.7201     | 0.0036    | -2.0921     |                                 |             |                               |             |
| LOC51152     | melanoma antigen                                        | 0.0007        | 2.3226      | 0.0629      | -1.4585     | 0.0022    | -2.0664     |                                 |             |                               |             |
| LOH3CR2A     | loss of heterozygosity, 3, chromosomal region 2, gene A | 0.0000        | 1.8499      | 0.0004      | -1.6119     | 0.0013    | -1.5004     |                                 |             |                               |             |
| MAP3K8       | mitogen-activated protein kinase kinase kinase 8        | 0.0013        | 2.4165      | 0.0211      | -1.7389     | 0.0198    | -1.7517     |                                 |             |                               |             |
| MGAM         | maltase-glucoamylase (alpha-glucosidase)                | 0.0001        | 3.1062      | 0.0003      | -2.6268     | 0.0001    | -2.9083     |                                 |             |                               |             |
| MPPED2       | metallophosphoesterase domain containing 2              | 0.0004        | 5.8904      | 0.0021      | -4.0747     | 0.0062    | -3.2702     |                                 |             |                               |             |
| NOS1AP       | nitric oxide synthase 1 (neuronal) adaptor protein      | 0.0028        | 1.9081      | 0.0058      | -1.7782     | 0.0067    | -1.7542     |                                 |             |                               |             |
| NRIP1        | nuclear receptor interacting protein 1                  | 0.0085        | 1.6740      | 0.0091      | -1.6640     | 0.0089    | -1.6660     | 0.0317                          | 1.8466      | 0.0264                        | 1.7688      |
| OTUD7A       | OTU domain containing 7A                                | 0.0044        | 2.1710      | 0.0105      | -1.9528     | 0.0014    | -2.5223     |                                 |             |                               |             |
| PRSS23       | protease, serine, 23                                    | 0.0019        | 2.2374      | 0.0022      | -2.2070     | 0.0038    | -2.0679     | 0.0005                          | 4.9945      | 0.0204                        | 2.1767      |
| RAB31        | RAB31, member RAS oncogene family                       | 0.0004        | 7.0704      | 0.0024      | -4.5410     | 0.0128    | -3.1479     |                                 |             |                               |             |
| SKA2         | spindle and kinetochore associated complex subunit 2    | 0.0054        | 1.5759      | 0.0055      | -1.5728     | 0.0007    | -1.8521     |                                 |             |                               |             |
| ST8SIA6      | ST8 alpha-N-acetyl-neuraminide alpha-2,8-sialyltransf   | 0.0017        | 5.6894      | 0.0264      | -2.9390     | 0.0153    | -3.3445     |                                 |             |                               |             |
| STARD4       | StAR-related lipid transfer (START) domain containing 4 | 0.0171        | 1.8212      | 0.0220      | -1.7664     | 0.0117    | -1.9041     |                                 |             | 0.0167                        | 1.6682      |
| TFPI2        | tissue factor pathway inhibitor 2                       | 0.0004        | 4.0762      | 0.0066      | -2.5474     | 0.0017    | -3.1801     |                                 |             |                               |             |
| ZNF814       | zinc finger protein 814                                 | 0.0004        | 2.6123      | 0.0175      | -1.7185     | 0.0000    | -3.6187     |                                 |             |                               |             |

**Genes downregulated by estrogen and upregulated with E+Tam and EWD**

| Gene Symbol | Gene Assignment                                          | E vs. placebo |             | E+Tam vs. E |             | EWD vs. E |             | MCF7 <sup>a</sup> (E+TOT vs. E) |             | MCF7 <sup>b</sup> (EWD vs. E) |             |
|-------------|----------------------------------------------------------|---------------|-------------|-------------|-------------|-----------|-------------|---------------------------------|-------------|-------------------------------|-------------|
|             |                                                          | p value       | fold change | p value     | fold change | p value   | fold change | p value                         | fold change | p value                       | fold change |
| ANG         | angiogenin, ribonuclease, RNase A family                 | 0.0185        | -1.8181     | 0.0429      | 1.6415      | 0.0431    | 1.6404      |                                 |             | 0.0031                        | -2.3793     |
| CPB1        | carboxypeptidase B1 (tissue)                             | 0.0054        | -19.8861    | 0.0027      | 27.8973     | 0.0284    | 8.8504      |                                 |             |                               |             |
| DACH1       | DACH1 // dachshund homolog 1 (Drosophila)                | 0.0004        | -3.2984     | 0.0029      | 2.4684      | 0.0172    | 1.9445      | 0.0149                          | -3.3799     |                               |             |
| ERBB4       | v-erb-a erythroblastic leukemia viral oncogene homolog 4 | 0.0086        | -3.3346     | 0.0054      | 3.6834      | 0.0175    | 2.8664      |                                 |             |                               |             |
| ERP27       | endoplasmic reticulum protein 27                         | 0.0071        | -3.1404     | 0.0104      | 2.9116      | 0.0496    | 2.1486      |                                 |             |                               |             |
| GCNT1       | glucosaminyl (N-acetyl) transferase 1, core 2            | 0.0033        | -2.1458     | 0.0008      | 2.5530      | 0.0331    | 1.6437      |                                 |             |                               |             |
| IGFBP5      | insulin-like growth factor binding protein 5             | 0.0000        | -6.9118     | 0.0035      | 2.5456      | 0.0121    | 2.1348      |                                 |             | 0.0368                        | -2.4230     |

|            |                                                           |        |         |        |        |        |        |        |         |
|------------|-----------------------------------------------------------|--------|---------|--------|--------|--------|--------|--------|---------|
| IL1RAPL2   | interleukin 1 receptor accessory protein-like 2           | 0.0028 | -2.1060 | 0.0002 | 2.9380 | 0.0052 | 1.9672 |        |         |
| INSIG2     | insulin induced gene 2                                    | 0.0274 | -2.7457 | 0.0360 | 2.5823 | 0.0144 | 3.1671 | 0.0079 | -1.8177 |
| IQGAP2     | IQ motif containing GTPase activating protein 2           | 0.0440 | -1.7199 | 0.0049 | 2.3070 | 0.0246 | 1.8600 |        |         |
| MT1M       | metallothionein 1M                                        | 0.0025 | -1.7291 | 0.0099 | 1.5501 | 0.0108 | 1.5389 |        |         |
| NCRNA00152 | non-protein coding RNA 152                                | 0.0001 | -3.0283 | 0.0438 | 1.5511 | 0.0068 | 1.8962 |        |         |
| NDST4      | N-deacetylase/N-sulfotransferase (heparan glucosaminyl) 4 | 0.0221 | -1.8296 | 0.0229 | 1.8210 | 0.0277 | 1.7772 |        |         |
| PTN        | pleiotrophin                                              | 0.0334 | -1.6439 | 0.0176 | 1.7690 | 0.0267 | 1.6869 |        |         |
| RNF128     | ring finger protein 128                                   | 0.0097 | -2.1164 | 0.0018 | 2.6602 | 0.0074 | 2.1954 |        |         |

<sup>a</sup>determined by importing dataset GSE3834 into Partek Genomics Suite and cross analyzing the E regulated genes at 24h E + 4-hydroxytamoxifen (TOT) vs. E

<sup>b</sup>determined by importing dataset GSE848 into Partek Genomics Suite and cross analyzing the E regulated genes at 48h EWD vs E
